# Supplementary material
Source: PubMed Central journal article supplement (PMC3478312)
Supplement: cc-11-3611-s01.pdf [file cc-11-3611-s01.pdf]

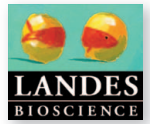

## **Supplemental Material to:**

**Ping-Hung Chen, Fan-Ching Chien, Sue-Ping Lee, Woan-Eng Chan, I-Hsuan Lin, Chun-Shan Liu, Fang-Jen Lee, Jiann-Shiun Lai, Peilin Chen, Hsin-Fang yang-yen and Jeffrey Jong-Young Yen**

**Identification of a novel function of the clathrin-coated structure at the plasma membrane in facilitating GM-CSF receptor-mediated activation of JAK2**

**2012; 11(19)**

**<http://dx.doi.org/10.4161/cc.21920>**

**<http://www.landesbioscience.com/journals/cc/article/21920>**

## **Supplemental Materials and Methods**

### **Preparation of Fab fragments recognizing human GMR $\alpha$ and GMR $\beta$**

Antibodies specific to human GMR $\alpha$  (CD116, clone 4H1) and GMR $\beta$  (CD131, clone 1C1) (eBioscience, CA, USA) were digested with papain, followed by running through the protein G-Sepharose CL-4B column (GE, Piscataway, NJ, USA) to remove the Fc fragments. The flow-through fraction that contains the Fab fragment was concentrated by using the Sephacry S-200 column (GE) according to the standard protocol. Purified Fab fragments recognizing GMR $\alpha$  or GMR $\beta$  were subsequently labeled with fluorochrome using Alexa Fluor<sup>®</sup> 488 protein labeling kit (Invitrogen, Grand Island, NY) or EasyLink-Cy5 conjugation kit (Abcam, Cambridge, MA, USA), respectively.

### **Photoactivated localization microscopy (PALM) analysis**

To investigate the distribution of GMR $\beta$ -paGFP molecules on the plasma membrane (**Fig. S1A**), HeLa cells transiently co-expressing GMR $\alpha$ -CFP and GMR $\beta$ -paGFP were treated or not treated with GM-CSF, and visualized under the TIRF microscope with CFP channel to select GMR $\alpha$ -positive cells for further PALM analysis. In PALM imaging acquisition, a solid-state laser (Changchun New Industries Optoelectronics Tech) with a wavelength of 405 nm (100 mW) was added to the dSTROM system as

the activation light source. To acquire the fluorescence image stacks, a few of pa-GFP fusion proteins were activated stochastically by the activation light. Then, the fluorescence signals from single pa-GFP molecules were recorded by the excitation light source with a wavelength of 473 nm. The fluorescence image stacks were collected by repeating the photo-activation and fluorescence read-out sequences. Finally, after localizing the centroids of individual molecules and image reconstruction, the PALM images of GMR $\beta$ -paGFP were obtained. The size of receptor cluster and number of receptor molecules in a cluster were calculated as described in the text.

FigS1

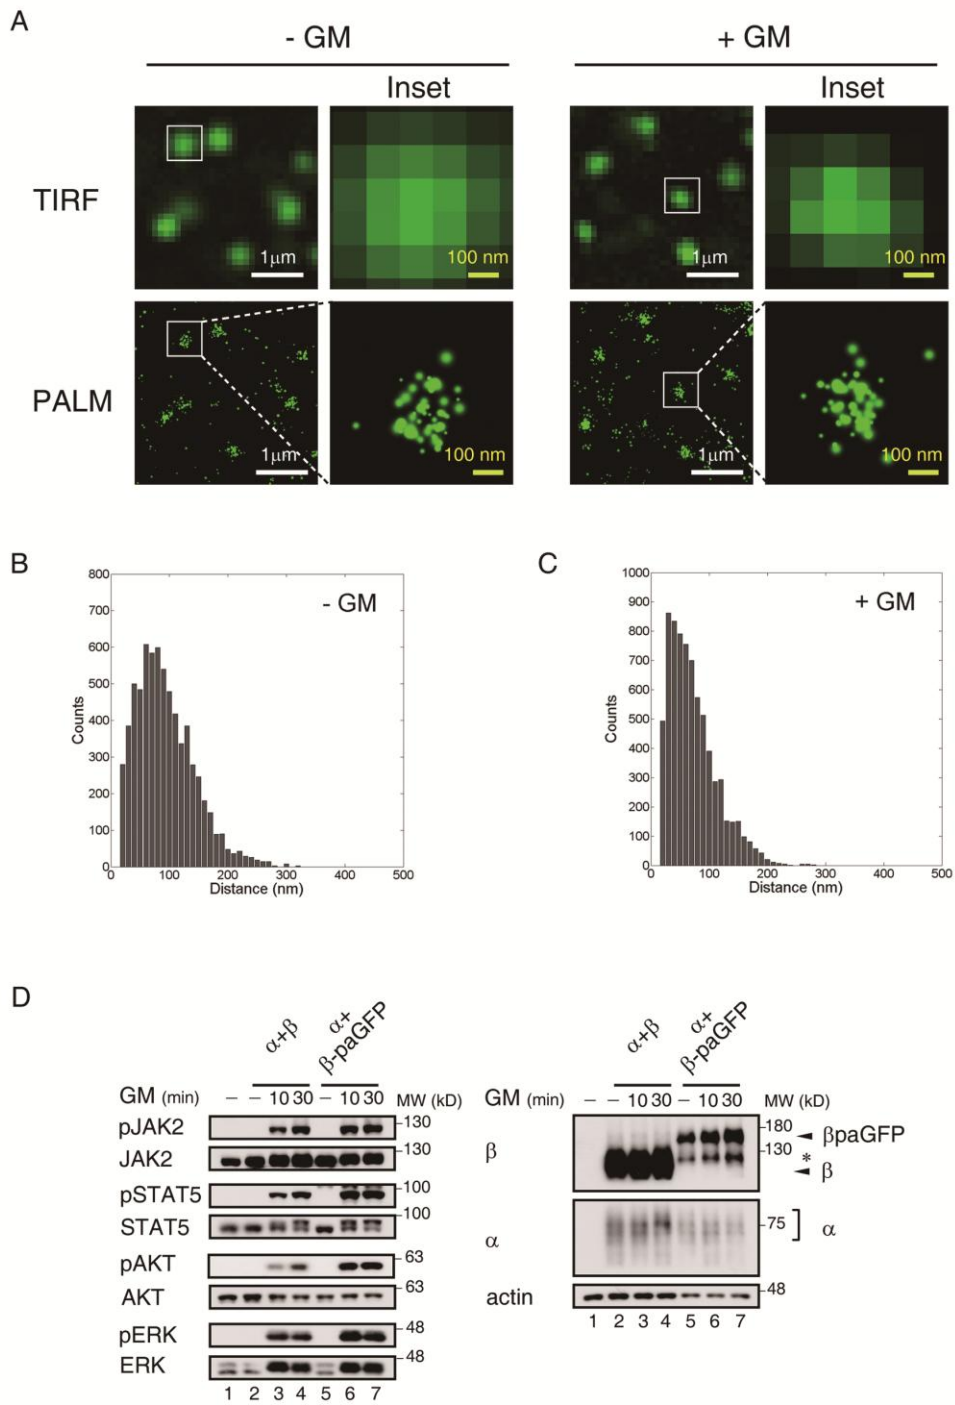

**Figure S1.** Surface GMR $\beta$ -paGFP molecules form ligand-independent nano-scale clusters. (A) TIRF and PALM images of GMR $\beta$ -paGFP clusters in HeLa cells transiently co-expressing GMR $\alpha$ -CFP (not shown) and GMR $\beta$ -paGFP in medium containing or not containing GM-CSF ( $\pm$ GM). (B) and (C) are representative pair distance histograms of GMR $\beta$ -paGFP proteins within a GMR $\beta$ -paGFP cluster shown in (A) calculated by protein pair distance correlation analysis. According to the distance histograms, the size of a GMR $\beta$ -paGFP cluster without or with ligand treatment are  $202.85 \pm 69.51$  nm and  $199.68 \pm 67.93$  nm, respectively. The average number of GMR $\beta$ -paGFP molecules in GMR $\beta$ -paGFP clusters without or with ligand treatment are  $53.58 \pm 15.74$  and  $53.40 \pm 26.09$ , respectively. (n=50). (D) GMR $\beta$ -paGFP transduces signals like the wt protein. HeLa cells transiently co-expressing GMR $\alpha$  ( $\alpha$ ) and wt GMR $\beta$  ( $\beta$ ) or GMR $\beta$ -paGFP ( $\beta$ -paGFP) were left untreated (-) or stimulated with hGM-CSF (10ng/ml) for 10 or 30 minutes. The cell lysates, resolved on two different membranes (left and right panels), were analyzed by immunoblotting using antibodies specific to each indicated molecule.

FigS2

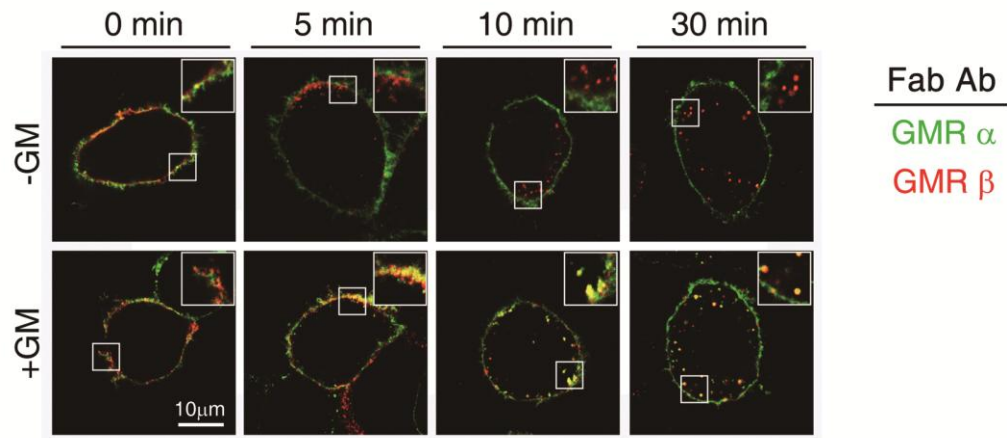

**Figure S2.** Ligand-dependent co-internalization of GMR $\alpha$  with GMR $\beta$  revealed by the internalization assay using the Fab fragments of GMR $\alpha$  and GMR $\beta$  antibodies. HeLa cells transiently co-expressing GMR $\alpha$  and GMR $\beta$  were pre-labeled with Alexa Fluor® 488-conjugated Fab fragment recognizing GMR $\alpha$  (green) and Cy5-conjugated Fab fragment recognizing GMR $\beta$  (red) at 4°C for 30 min. Receptor endocytosis was then initiated by transferring these antibody-labeled cells to 37°C in medium containing or not containing GM-CSF ( $\pm$ GM). At various time points (0-30 min) after receptor endocytosis had started, cells were immediately shifted back to 4°C, fixed with 4% paraformaldehyde and the extent of receptor internalization was analyzed by confocal microscopy.

FigS3

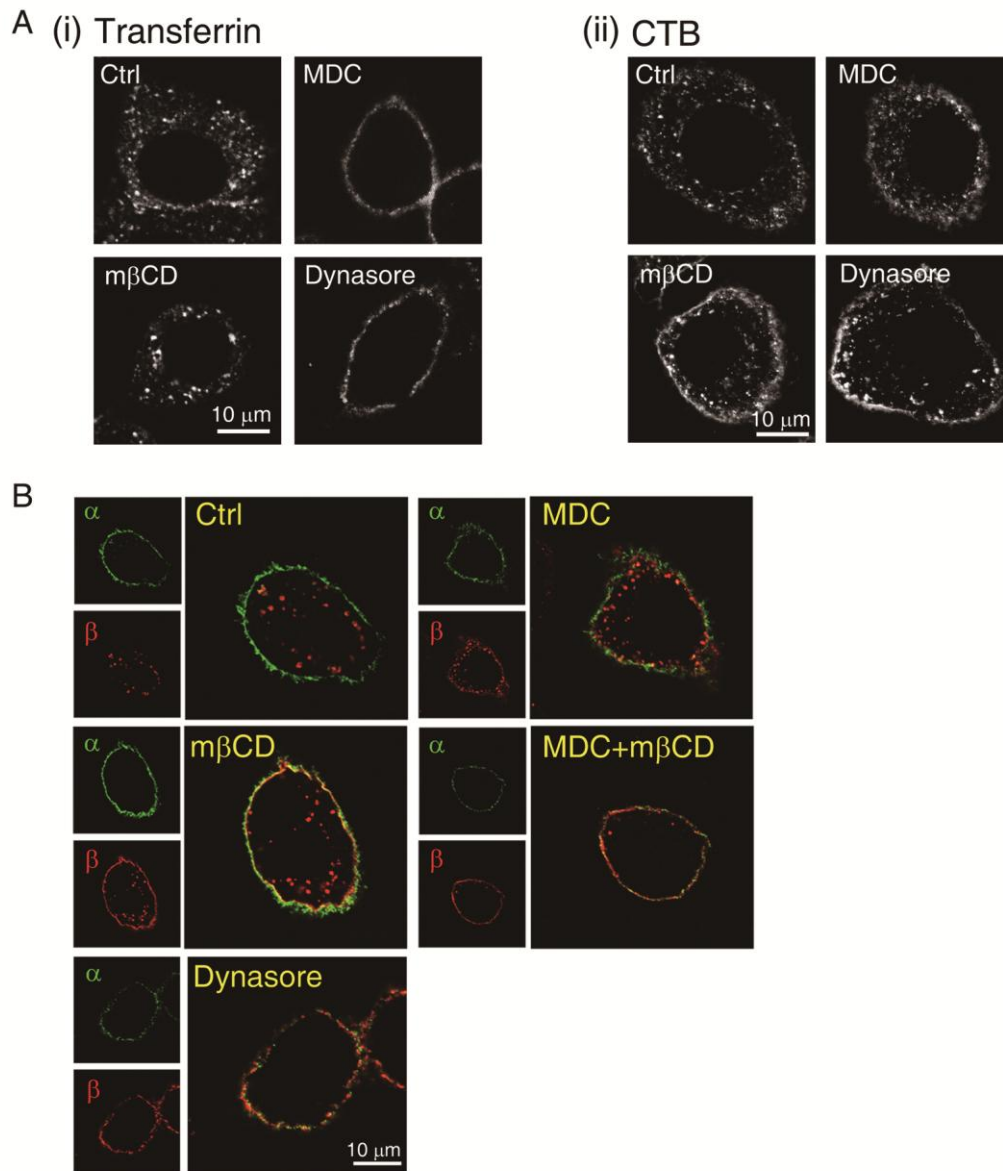

**Figure S3.** (A) Specificity of various endocytic pathway inhibitors. Endocytosis of Alexa Flour®633 conjugated transferrin (i) or Alexa Flour®555 conjugated cholera toxin subunit B (CTB) (ii) in HeLa cells was allowed to proceed for 15 min at 37°C in the presence of the indicated inhibitors. (B) Unliganded GMRβ is endocytosed via both clathrin- and lipid raft-dependent pathways. The endocytosis of unliganded

receptor was allowed to proceed in HeLa cells transiently co-expressing GMR $\alpha$  (green) and GMR $\beta$  (red) in the presence of the indicated endocytosis inhibitors essentially as that described in the legend to Figure 2C in the text except that cells were placed in ligand-free medium during the endocytosis step.



FigS4

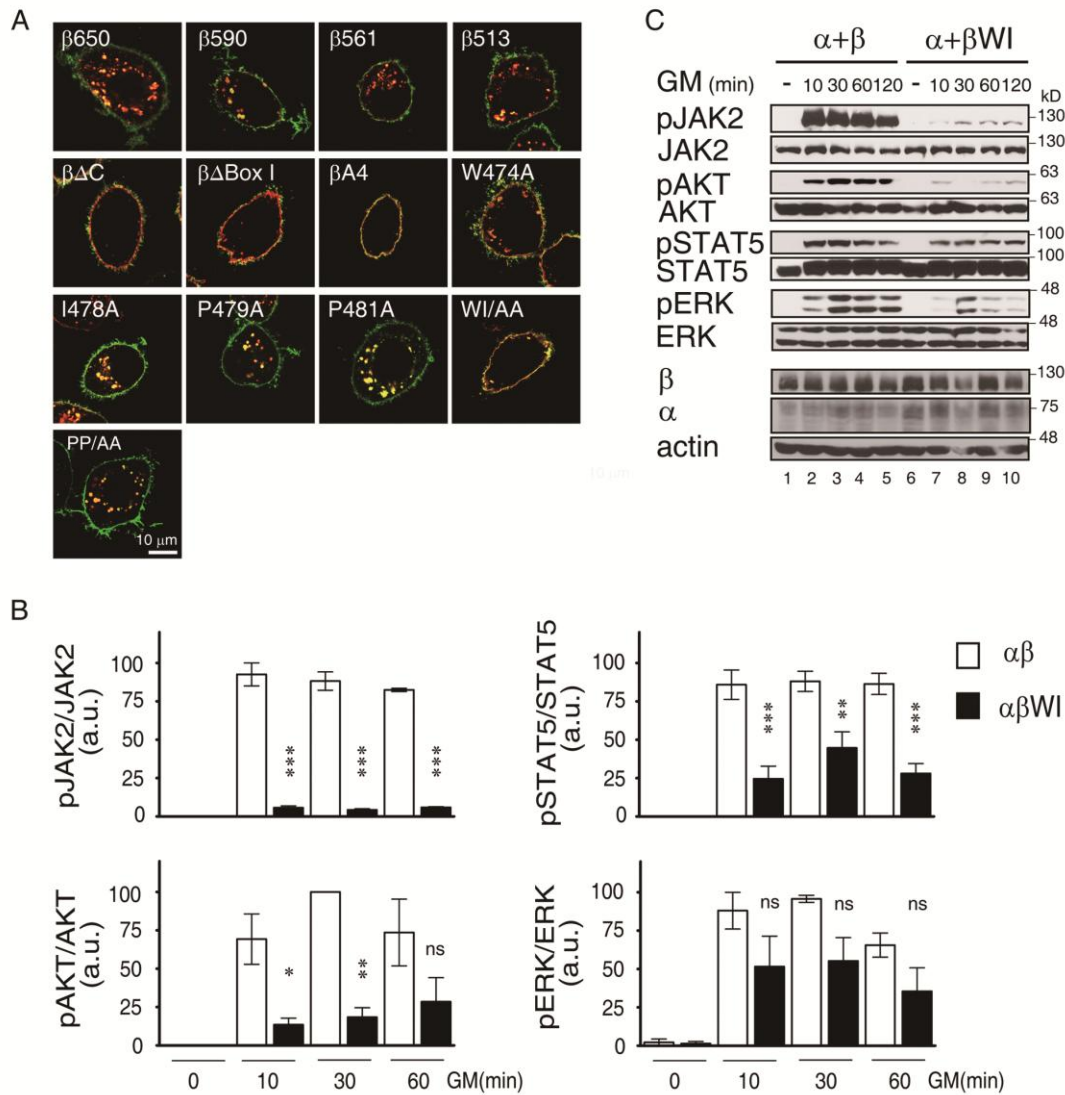

**Figure S4.** The WI/AA mutation impairs GMR internalization and signaling.

(A) The internalization assay was performed with HeLa cells transiently co-expressing GMR $\alpha$  (green) and each GMR $\beta$  mutant as indicated (red). After 30 min in medium containing GM-CSF, cells were processed and analyzed by confocal microscope. (B) The activation (phosphorylation) extent of JAK2 and AKT in  $\alpha\beta$ - and  $\alpha\beta$ WI-Ba/F3 cells shown in Fig. 3F of the text plus very similar results from two other independent experiments was quantified and plotted essentially as that described

in the Materials and methods. \*,  $p < 0.05$ ; \*\*  $p < 0.01$ ; \*\*\*  $p < 0.001$ . n.s., no statistical difference. (C) HeLa cells transiently co-expressing GMR $\alpha$  and wt or the WI/AA mutant of GMR $\beta$  were left untreated (-) or stimulated with hGM-CSF (10ng/ml) for various time points as indicated. The cell lysates were analyzed by immunoblotting using antibodies specific to each indicated molecule.

FigS5

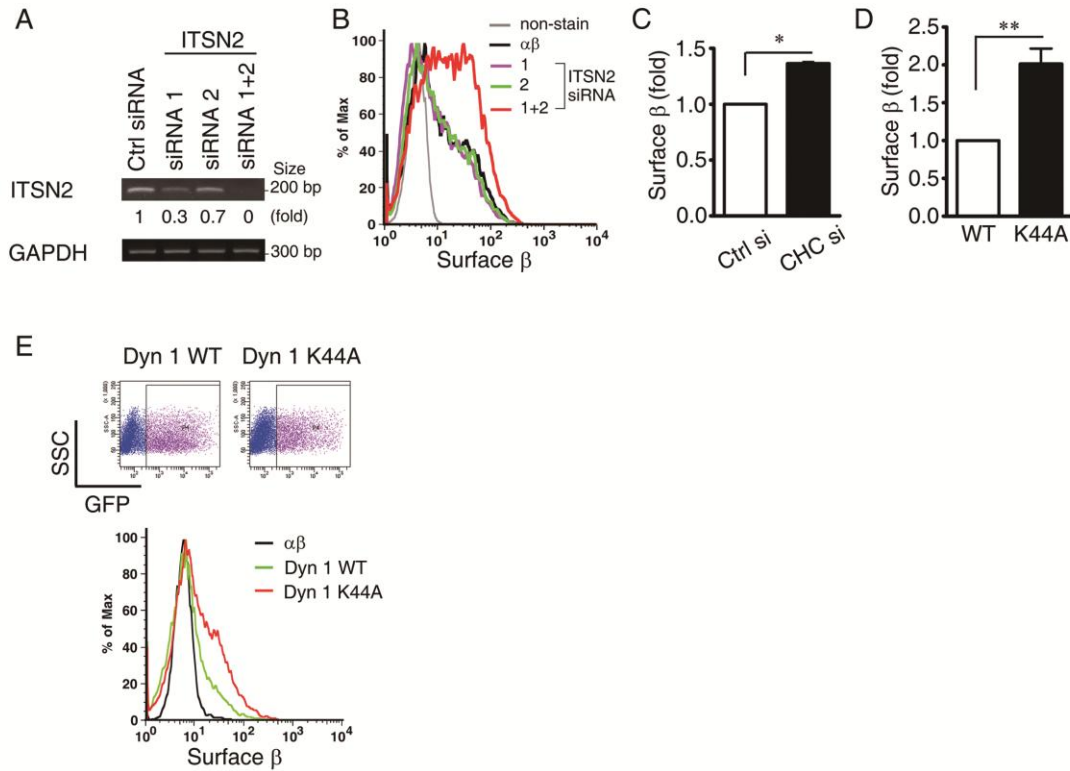

**Figure S5.** Interference of clathrin-mediated endocytosis inhibits GMRβ internalization. (A) The ITSN2 mRNA levels in control and ITSN2 knockdown (with siRNA1, siRNA2 or the combination of both) αβ-Ba/F3 cells were determined by semi-quantitative RT-PCR. (B-D) Flow cytometric analysis of cell surface levels of GMRβ in control, ITSN2 or CHC knockdown αβ-Ba/F3 cells or in αβ-Ba/F3 cells transiently expressing wt or the K44A mutant of dynamin I. Data shown (mean ± SEM, n=3) are relative protein levels compared to that of the control cells. \* p<0.05; \*\*, p<0.01. (E) Representative FACS profiles of dynamin I-GFP fusion proteins and surface expression of GMRβ in control or in αβ-Ba/F3 cells transiently expressing wt or the K44A mutant of dynamin I. Similar number of GFP positive cells were sorted

out from  $\alpha\beta$ -Ba/F3 cells transiently expressing wt or the K44A mutant of dynamin I for immunoblotting analysis shown in Fig. 4H of the text.
